# Supplementary material for: Carbon nitride quantum dots tethered on CNTs for the electrochemical detection of dopamine and uric acid
Source: Royal Society of Chemistry journal article supplement (doi:10.1039/d1nj00555c), 2021-01-01
Supplement: d1nj00555c1.pdf [file d1nj00555c1.pdf]

## Electronic Supporting information

### Carbon nitride quantum dots tethered CNT for electrochemical detection of dopamine and uric acid

Biyas Posh<sup>a</sup>, Narayanan Asha<sup>b</sup>, N. Sandhyarani<sup>a\*</sup>

- a. Nanoscience Research laboratory, School of Materials Science and Engineering, National Institute of Technology Calicut 673601, Kerala, India, Fax: 91 495 2287250; Tel: 91 495 2286537;
- b. Department of Chemistry, Mercy College, Palakkad, Kerala, India

[sandhya@nitc.ac.in](mailto:sandhya@nitc.ac.in)

#### 1. SEM images of g-C<sub>3</sub>N<sub>4</sub> and CNNSs

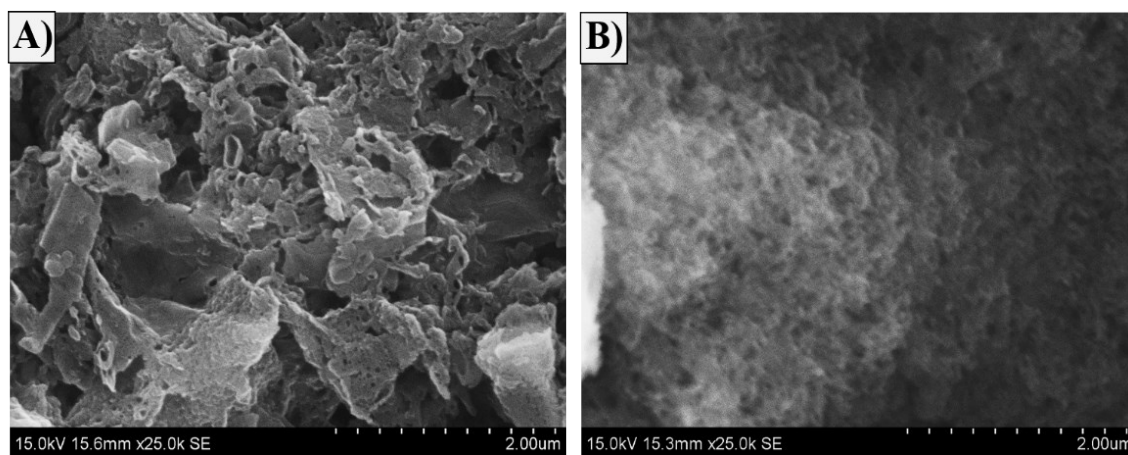

Fig. S1. SEM images of g-C<sub>3</sub>N<sub>4</sub> (A) and CNNSs (B)

2. DPVs of various concentration's of DA in the presence of 1mM AA and 10 $\mu$ M UA at *f*-CNT/GCE.

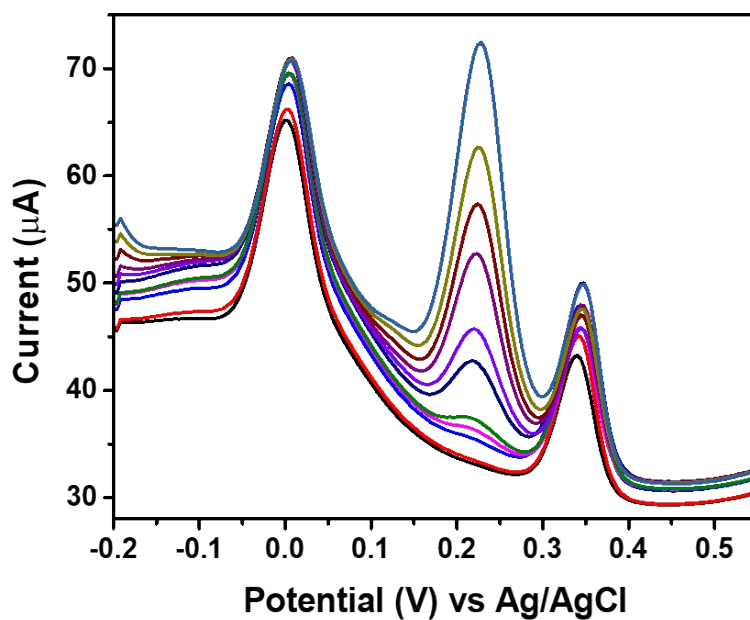

Fig. S2. DPVs of various concentration's of DA (50 nM, 100 nM, 400 nM, 700 nM, 1 $\mu$ M, 3  $\mu$ M, 5  $\mu$ M, 7  $\mu$ M, 9  $\mu$ M, 11  $\mu$ M and 13  $\mu$ M) in the presence of 1mM AA and 10 $\mu$ M UA at *f*-CNT/GCE.

### 3. Optimization of detection conditions.

Response of current and potential of 0.1 mM DA and 0.15 mM UA at CNQDs/*f*-MWCNT/GCE towards different pH.

The slope value obtained for DA is  $-59.3 \text{ mV pH}^{-1}$  ( $E^0 \text{ (V)} = -0.059 \text{ pH} + 0.57$ ,  $R^2 = 0.99$ ) and UA is  $-60.7 \text{ mV pH}^{-1}$  ( $E^0 \text{ (V)} = -0.06 \text{ pH} + 0.72$ ,  $R^2 = 0.99$ ).

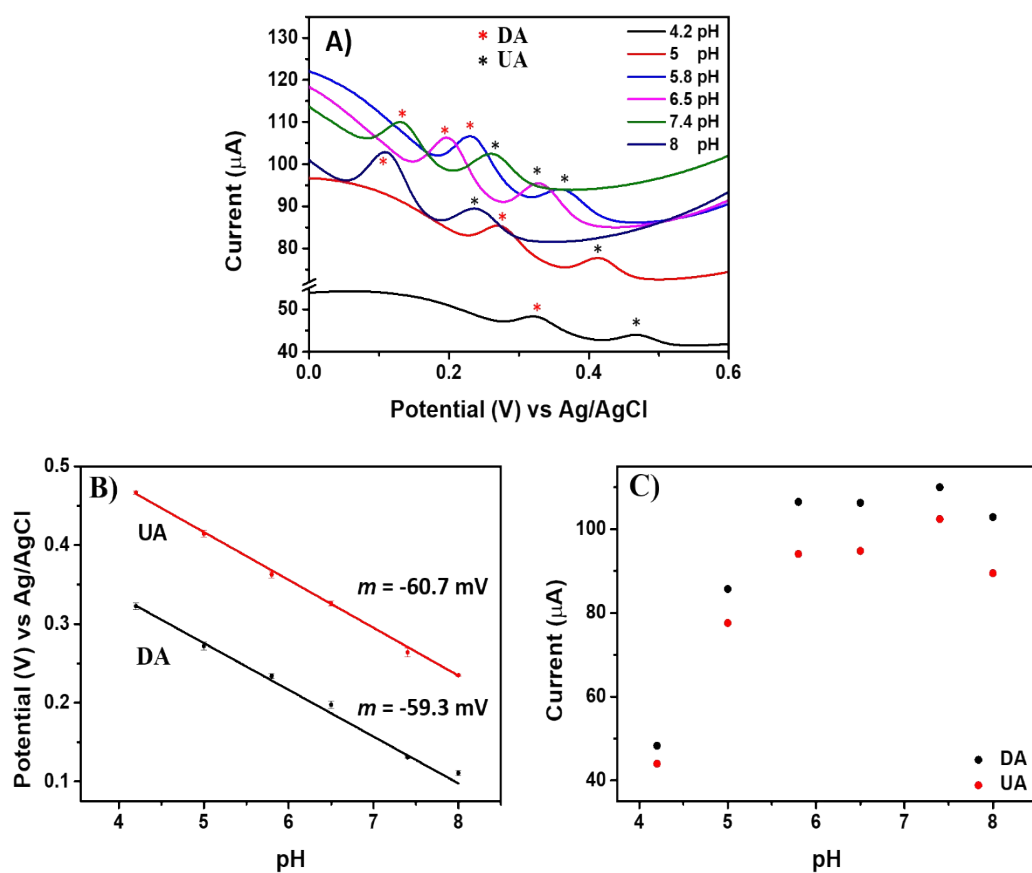

Fig. S3. (A) DPVs recorded for a mixture of 0.1 mM DA and 0.15 mM UA at different pH values from 4.2 to 8 at CNQDs/*f*-CNT/GCE, (B) calibration plots of DA and UA for  $E^0$  vs pH for CNQDs/*f*-CNT/GCE, (C) plots of peak current of DA and UA vs pH for CNQDs/*f*-CNT/GCE.

#### 4. The kinetics of electrode reaction -The influence of scan rate on anodic peak current

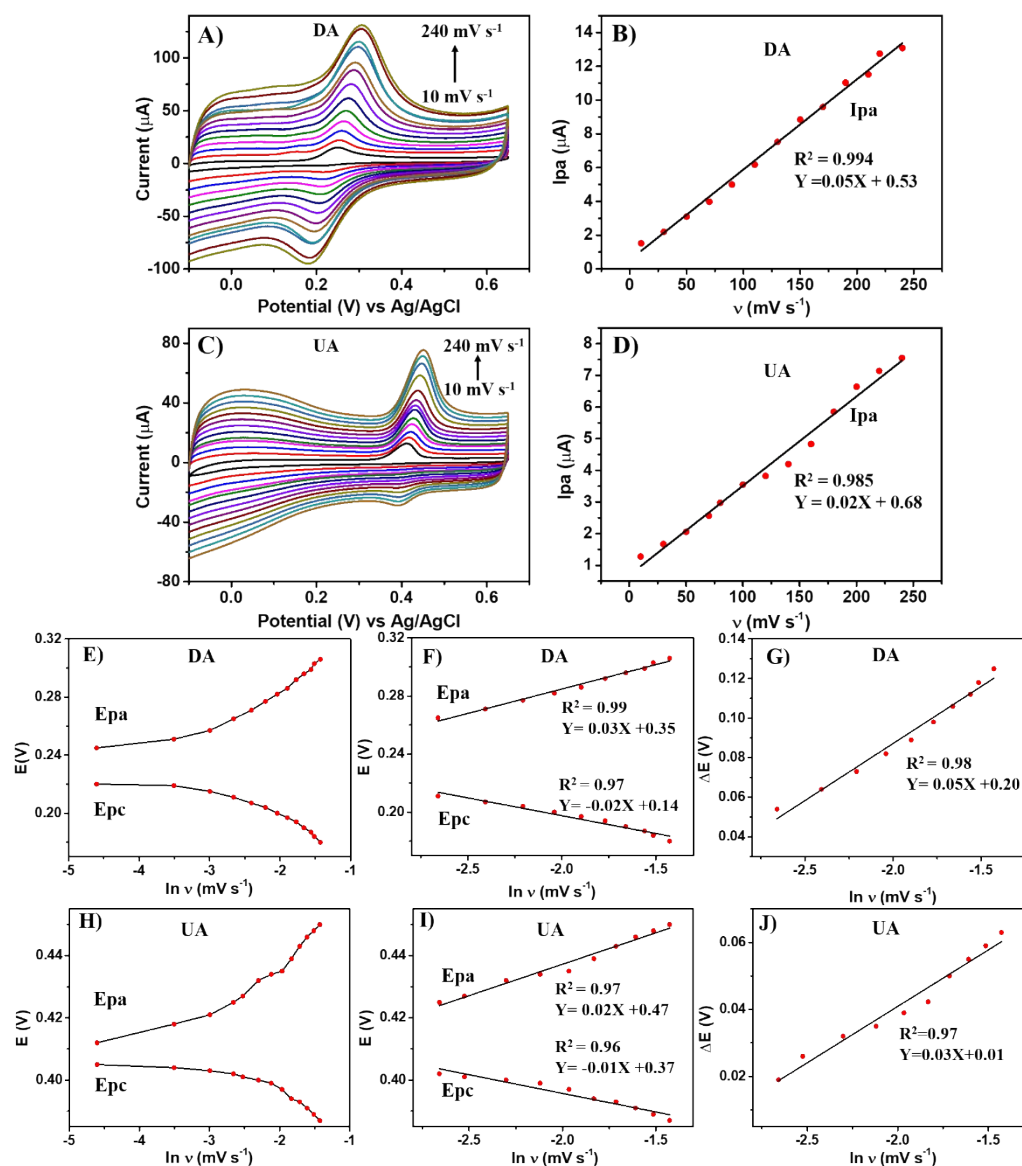

Fig S4. CVs of 200  $\mu\text{M}$  DA (A), 200  $\mu\text{M}$  UA (C) at CNQDs/*f*-CNT/GCE with different scan rates (10-240  $\text{mV s}^{-1}$ ) in 0.1 M PBS (pH -7.4); linear plot of anodic peak current of DA vs. scan rate (B) and linear plot of anodic peak current of UA vs. scan rate (D); variations of  $E_p$  vs.  $\ln v$  (E) and magnified image of the same plot for high scan rates (F) for DA; variations of  $\Delta E_p$  vs.  $\ln v$  (G) for DA; variations of  $E_p$  vs.  $\ln v$  (H) and magnified image of the same plot for high scan rates (I) for UA; variations of  $\Delta E_p$  vs.  $\ln v$  (J) for UA.

## 5. Interference study – Selectivity of CNQDs/*f*-MWCNT/GCE

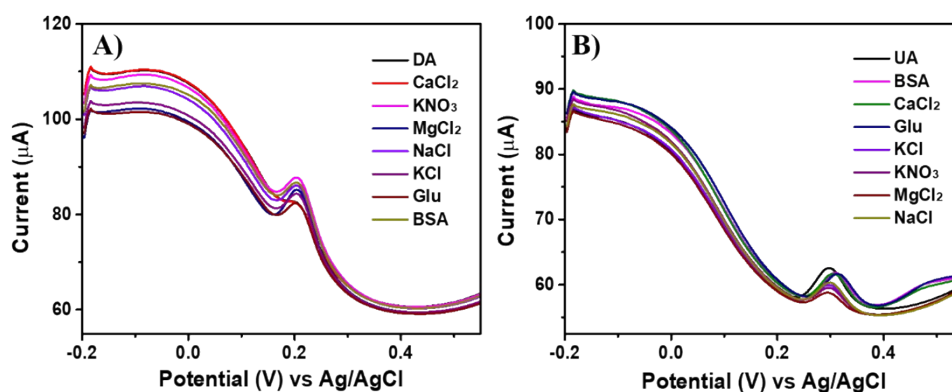

Fig. S5 Influence of 0.01 M interferents (glucose, bovine serum albumin, KCl, NaCl, MgCl<sub>2</sub>, CaCl<sub>2</sub> and KNO<sub>3</sub>) on 0.1 mM DA in 0.1 M PBS at 0.14 V vs Ag/AgCl (A) and 0.15 mM UA in 0.1 M PBS at 0.31 V vs Ag/AgCl (B).

## 6. Stability of the CNQDs/*f*-MWCNT/GCE sensor: Current response at 244 mV obtained by 0.1 mM DA in DPV over a period of 1 month.

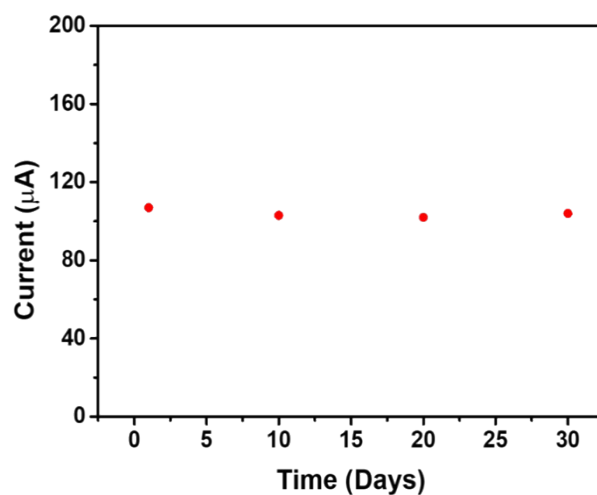

Fig. S6. Current response of 0.1 mM DA monitored at 244 mV in DPV for 30 days.

**7. Results obtained using the DPV method in the detection of dopamine (Table S1) and uric acid (Table S2) spiked into biological fluid, human serum.**

DPV of different concentrations of DA at CNQDs/*f*-CNT/GCE containing 0.1 mL of human serum in 0.1 M PBS

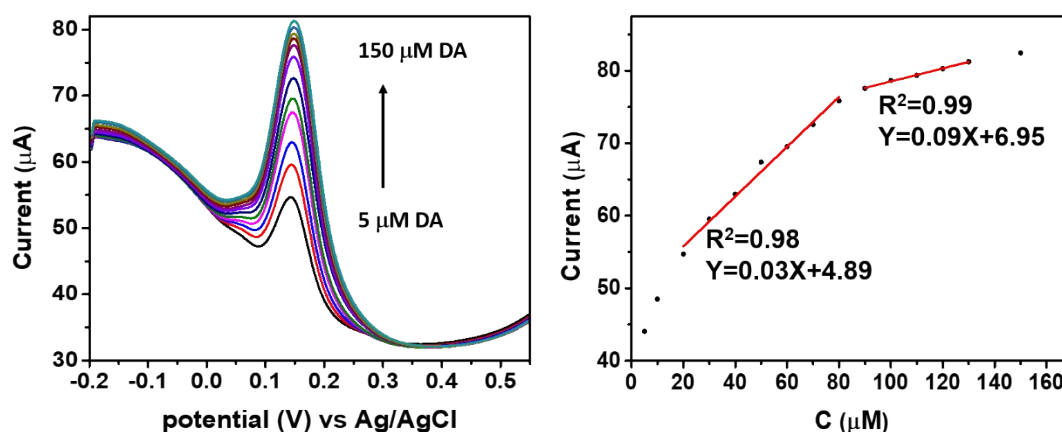

Fig. S7. (A) DPV response of different concentration of DA (5 - 150  $\mu\text{M}$ ) at CNQDs/*f*-CNT/GCE containing 0.1 mL of human serum in 0.1 M PBS. (B) the calibration plot of current vs concentration of DA.

**Table S1. Determination of DA in human blood serum sample at CNQDs/*f*-CNT/GCE.**

| No      | Added ( $\mu\text{M}$ ) | Found ( $\mu\text{M}$ ) | Recovery (%) |
|---------|-------------------------|-------------------------|--------------|
| Serum 1 | 40                      | 40.9                    | 102.25       |
| Serum 2 | 70                      | 69.00                   | 98.5         |
| Serum 3 | 80                      | 78.43                   | 98.03        |
| Serum 4 | 100                     | 101.37                  | 101.37       |
| Serum 5 | 120                     | 119.78                  | 99.81        |

DPV of different concentrations of UA at CNQDs/*f*-CNT/GCE containing 0.1 mL of human serum in 0.1 M PBS.

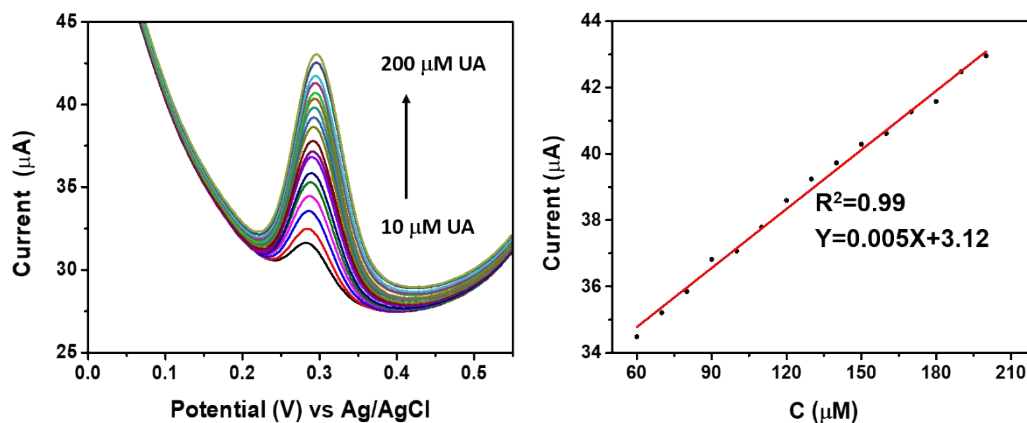

Fig. S8 (A) DPV response of different concentration of UA (10 - 200  $\mu\text{M}$ ) at CNQDs/*f*-CNT/GCE containing 0.1 mL of human serum in 0.1 M PBS. (B) the calibration plot of current vs concentration of UA.

**Table S2. Determination of UA in human blood serum sample at CNQDs/*f*-CNT/GCE**

| No      | Added ( $\mu\text{M}$ ) | Recovered ( $\mu\text{M}$ ) | Recovery (%) |
|---------|-------------------------|-----------------------------|--------------|
| Serum 1 | 80                      | 78.09                       | 97.612       |
| Serum 2 | 100                     | 98.67                       | 98.67        |
| Serum 3 | 120                     | 124.46                      | 103.71       |
| Serum 4 | 150                     | 152.91                      | 101.94       |
| Serum 5 | 200                     | 197.89                      | 98.945       |
